# Supplementary material for: A CNT cocoon on sodium manganate nanotubes forming a core/branch cathode coupled with a helical carbon nanofibre anode for enhanced sodium ion batteries
Source: Royal Society of Chemistry journal article supplement (doi:10.1039/c6ta05069g), 2016-01-01
Supplement: c6ta05069g1.pdf [file c6ta05069g1.pdf]

Supporting Information for

**CNTs Cocoon on Sodium Manganate Nanotubes Forming Core/branch cathode coupled with helical carbon nanofibres anode for enhanced sodium ion Batteries**

By Yu Zhong, Xinhui Xia\*, Jiye Zhan, Xiuli Wang, Jiangping Tu

Prof. X. H. Xia, Prof. J. P. Tu, Prof. X. L. Wang, Y. Zhong, J. Y. Zhan

State Key Laboratory of Silicon Materials, Key Laboratory of Advanced Materials and Applications for Batteries of Zhejiang Province, and Department of Materials Science and Engineering, Zhejiang University, Hangzhou 310027, P. R. China

E-mail: [helloxxh@zju.edu.cn](mailto:helloxxh@zju.edu.cn)

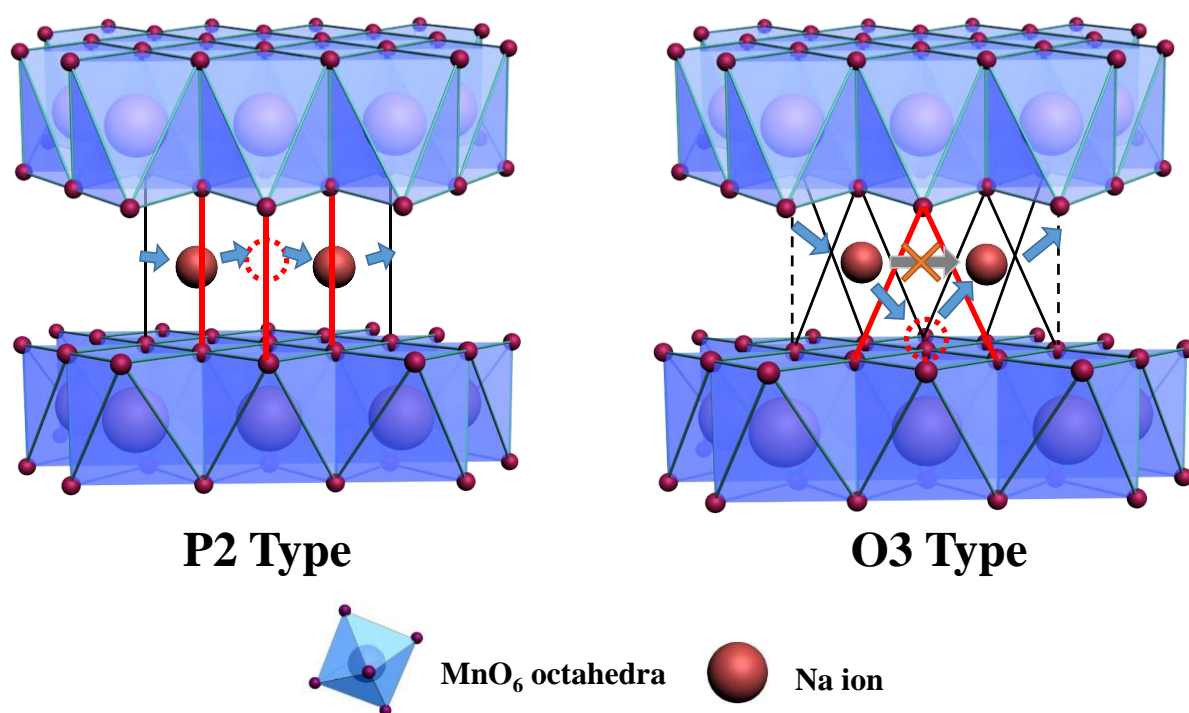

**Figure S1.** Schematic of the P2-type and O3-type layered sodium manganese oxides and the mobility path of sodium ions in the interlayers

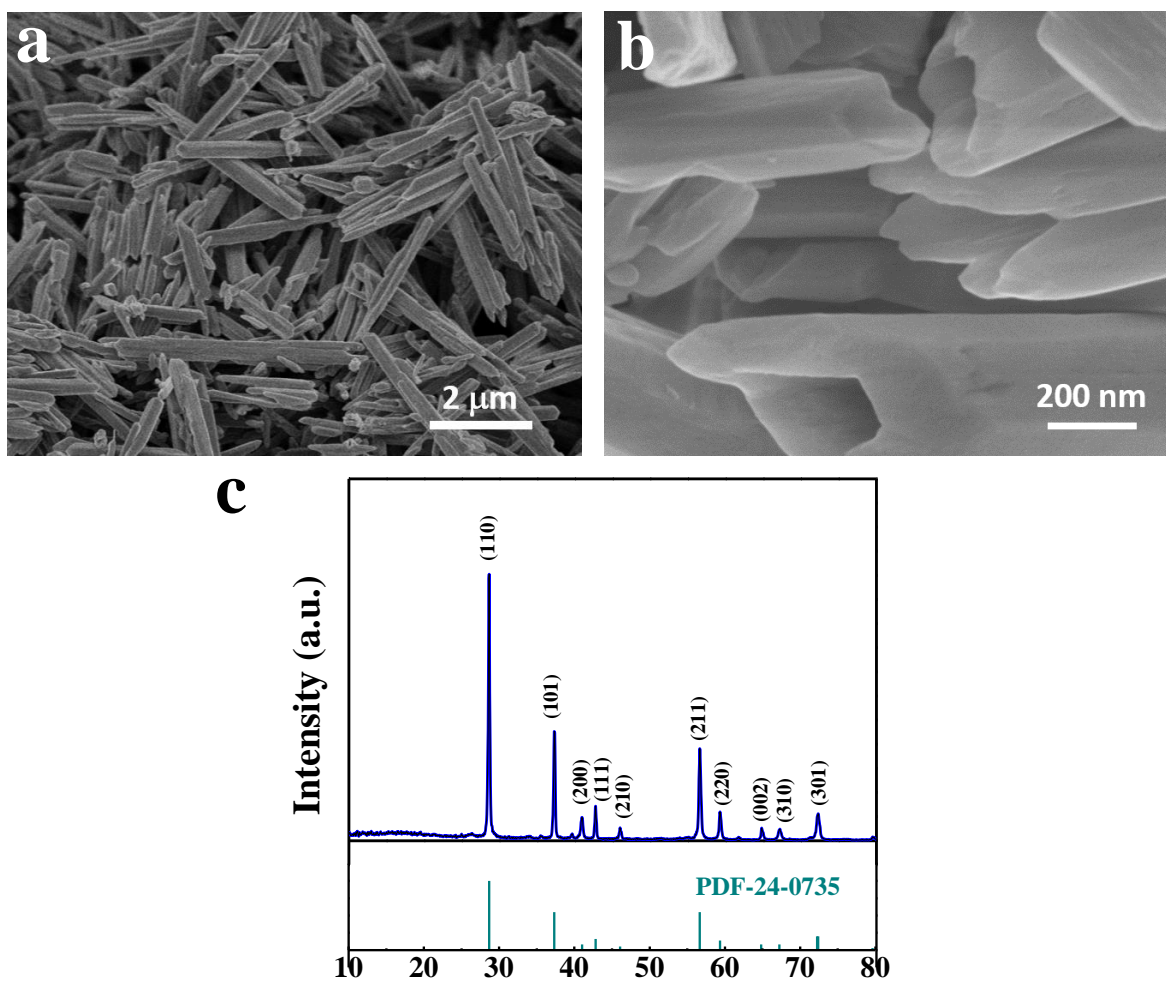

**Figure S2.** a,b) SEM images of as-prepared-MnO<sub>2</sub>; c) XRD pattern of as-prepared β-MnO<sub>2</sub>.

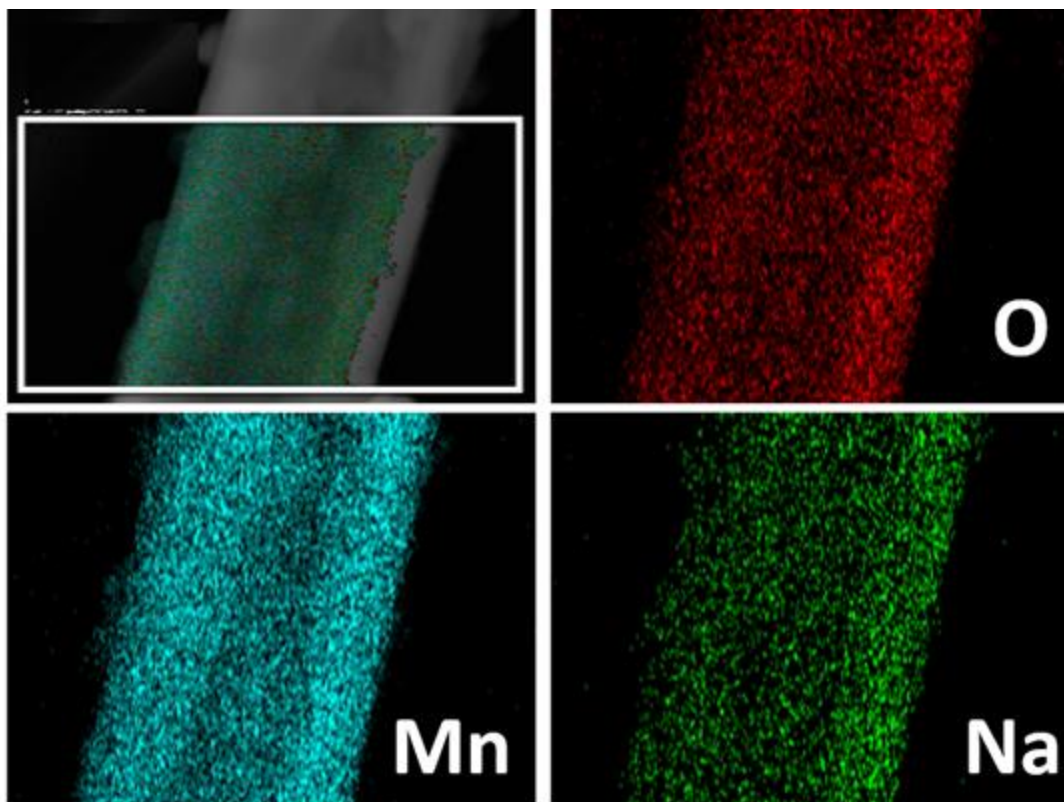

**Figure S3.** Element mapping images of O, Mn and Na.

**Table S1.** Na:Mn stoichiometric ratio of the as-prepared NMO analyzed by ICP-AES.

| Element     | Na  | Mn |
|-------------|-----|----|
| Molar ratio | 0.7 | 1  |

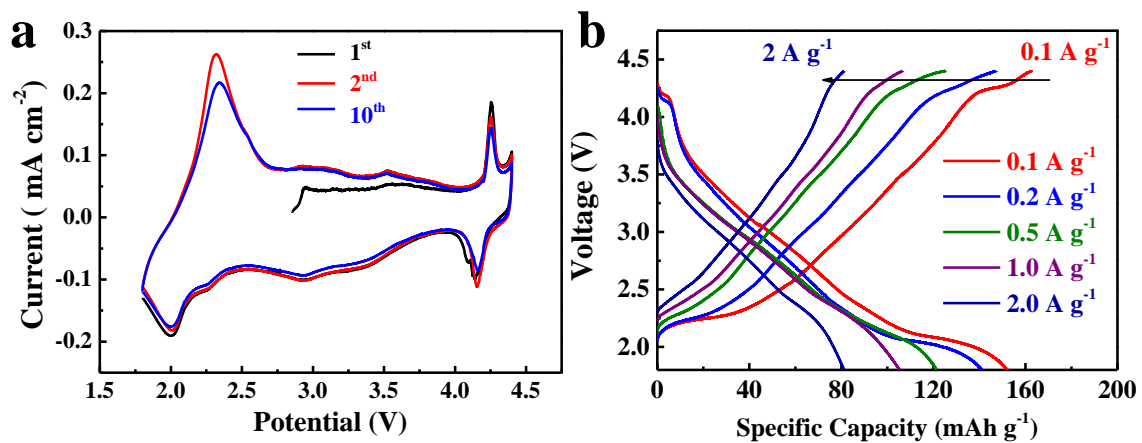

**Figure S4.** a) CV curves of NMO at a scan rate of  $0.1 \text{ mVs}^{-1}$  of the 1<sup>st</sup>, 2<sup>nd</sup> and 10<sup>th</sup> cycle between 1.8 and 4.4 V. b) Discharge/charge voltage profiles at the various current densities from  $0.1 \text{ A g}^{-1}$  to  $2 \text{ A g}^{-1}$  at the 2<sup>th</sup> cycle.

**Table S2:** Literature overview: Sodium storage capacities for different sodium manganese oxide materials.

| Type of NMO                                               | Current Density/<br>A g <sup>-1</sup> | Capacity/<br>mAh g <sup>-1</sup> | Cycling performance                              | Potential Window<br>/V | Reference |
|-----------------------------------------------------------|---------------------------------------|----------------------------------|--------------------------------------------------|------------------------|-----------|
| Na <sub>4</sub> Mn <sub>9</sub> O <sub>18</sub>           | 0.12                                  | 128                              | 77% after 1000 cycles                            | 1.5 - 4.1              | [1]       |
|                                                           | 1.2                                   | 94                               |                                                  |                        |           |
|                                                           | 2.4                                   | 82                               |                                                  |                        |           |
| Na <sub>0.7</sub> MnO <sub>2</sub>                        | 0.04                                  | 163                              | 93.7% after 10 cycles                            | 2 - 4.5                | [2]       |
|                                                           | 0.08                                  | 150                              |                                                  |                        |           |
|                                                           | 0.18                                  | 125                              |                                                  |                        |           |
| Na <sub>0.67</sub> MnO <sub>2</sub>                       | 0.01                                  | 174                              | 83% after 60 cycles                              | 2 – 4.3                | [3]       |
|                                                           | 0.05                                  | 120                              |                                                  |                        |           |
|                                                           | 0.25                                  | 88                               |                                                  |                        |           |
| Na <sub>0.71</sub> MnO <sub>2</sub> ·0.25H <sub>2</sub> O | 0.01                                  | 149.5                            | 87% after 100 cycles                             | 1.8 – 3.7              | [4]       |
|                                                           | 0.02                                  | 135.3                            |                                                  |                        |           |
|                                                           | 0.4                                   | 89.7                             |                                                  |                        |           |
| Na <sub>0.6</sub> MnO <sub>2</sub>                        | Not reported                          | 156                              | 36% after 10 cycles                              | 2.0 – 3.8              | [5]       |
| Na <sub>0.7</sub> MnO <sub>2.05</sub>                     | 0.1                                   | 162.3                            | 88% after 100 cycles at<br>0.1 A g <sup>-1</sup> | 1.8 – 4.4              | This work |
|                                                           | 0.5                                   | 133.9                            |                                                  |                        |           |
|                                                           | 2.0                                   | 101.9                            |                                                  |                        |           |

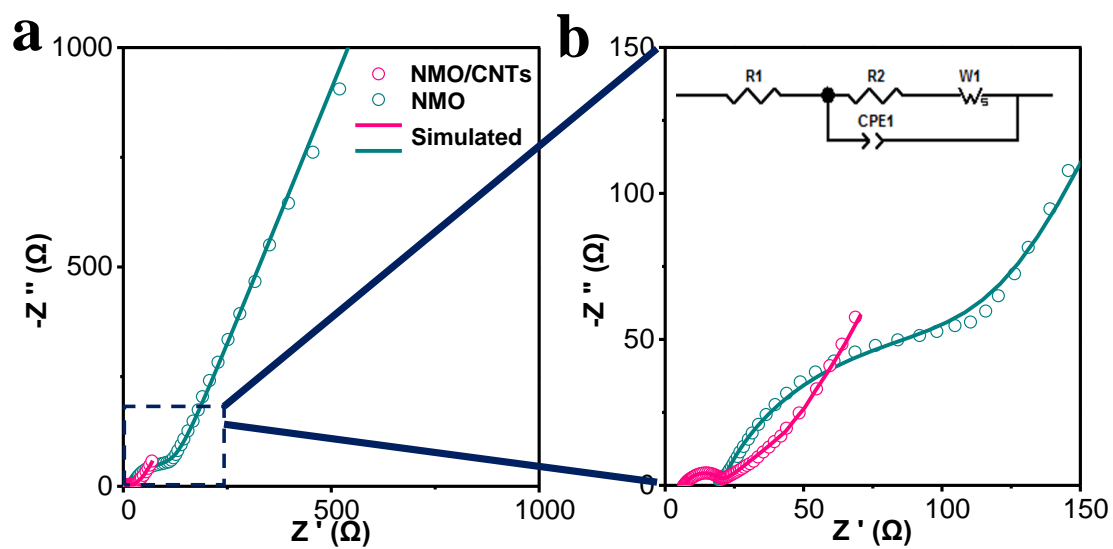

**Figure S5.** a) Nyquist plots of NMO and NMO/CNTs at potential of 4.3 V after 5th cycle. b) Enlarged Nyquist plots of the marked area in (a).

**Table S3:** Literature overview: sodium storage capacities for different carbon-based materials.

| Type of carbon         | Temp./ °C | Capacity/<br>mAh g <sup>-1</sup> | Rate/<br>Current density    | Potential<br>Window<br>/V | Reference        |
|------------------------|-----------|----------------------------------|-----------------------------|---------------------------|------------------|
| Templated carbon       | RT        | 130                              | C/5                         | 0.01-1.6                  | [6]              |
| Carbon black           | RT        | 121                              | C/75                        | Not reported              | [7]              |
| Biomass-derived carbon | RT        | 122                              | 0.1 A g <sup>-1</sup>       | 0.001-2.8                 | [8]              |
| Carbon black           | RT        | 120                              | 0.1 A g <sup>-1</sup>       | 0.15-2.0                  | [9]              |
| Sphere carbon          | RT        | 105                              | 0.075 A g <sup>-1</sup>     | 0.1-2.0                   | [10]             |
| <b>HCNFs</b>           | <b>RT</b> | <b>136.1</b>                     | <b>0.1 A g<sup>-1</sup></b> | <b>0.01-1.5</b>           | <b>This work</b> |

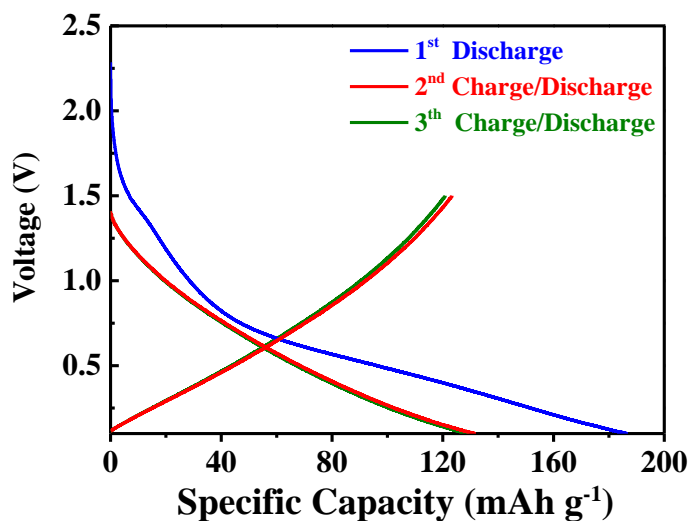

**Figure S6.** Discharge/charge voltage profiles of HCNFs electrode at 0.1 A g<sup>-1</sup> at the 1<sup>st</sup> cycle, 2<sup>nd</sup> cycle and 3<sup>rd</sup> cycle.



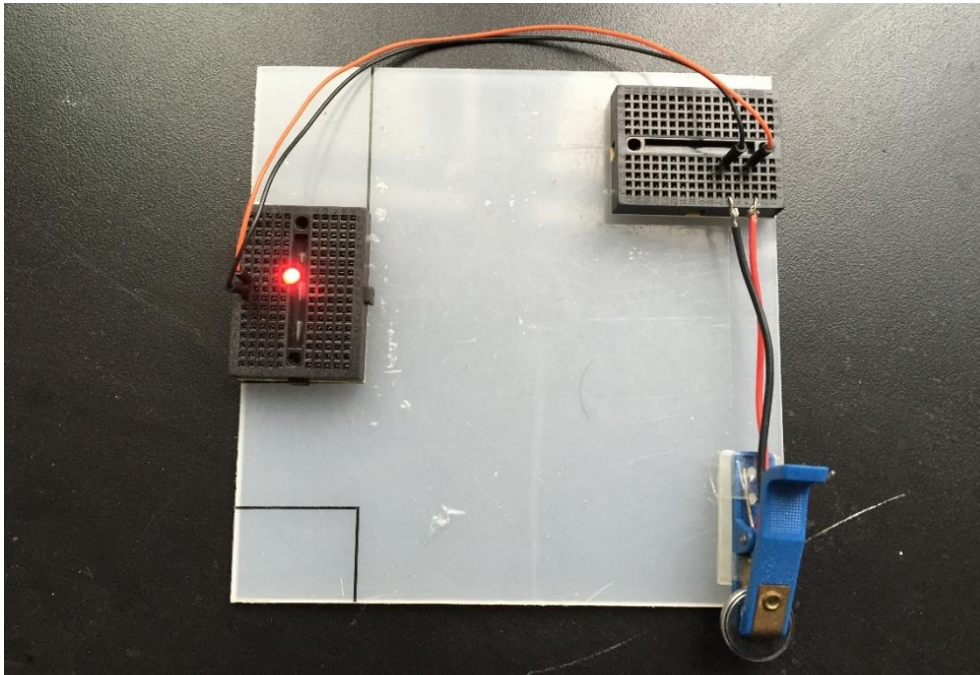

**Figure S7.** Optical image showing a LED (2.0 V) powered by NMO/CNTs//HCNFs SIB full cell.

- [1] Y. Cao, L. Xiao, W. Wang, D. Choi, Z. Nie, J. Yu, L. V. Saraf, Z. Yang, J. Liu, *Advanced materials* **2011**, 23, 3155.
- [2] D. Su, C. Wang, H. J. Ahn, G. Wang, *Chemistry* **2013**, 19, 10884.
- [3] M. Xu, Y. Niu, Y. Li, S. Bao, C. M. Li, *RSC Advances* **2014**, 4, 30340.
- [4] K. W. Nam, S. Kim, E. Yang, Y. Jung, E. Levi, D. Aurbach, J. W. Choi, *Chemistry of Materials* **2015**, 27, 3721.
- [5] A. Caballero, L. Hernan, J. Morales, L. Sanchez, J. S. Pena, M. Aranda, *Journal of Materials Chemistry* **2002**, 12, 1142.
- [6] S. Wenzel, T. Hara, J. Janek, P. Adelhelm, *Energy & Environmental Science* **2011**, 4, 3342.
- [7] R. Alcántara, J. M. Jiménez-Mateos, P. Lavela, J. L. Tirado, *Electrochemistry Communications* **2001**, 3, 639.
- [8] P. Wang, B. Qiao, Y. Du, Y. Li, X. Zhou, Z. Dai, J. Bao, *The Journal of Physical Chemistry C* **2015**, 119, 21336.
- [9] W. Luo, C. Bommier, Z. Jian, X. Li, R. Carter, S. Vail, Y. Lu, J.-J. Lee, X. Ji, *ACS applied materials & interfaces* **2015**, 7, 2626.
- [10] V. G. Pol, E. Lee, D. Zhou, F. Dogan, J. M. Calderon-Moreno, C. S. Johnson, *Electrochimica Acta* **2014**, 127, 61.
